# Supplementary material
Source: PubMed Central journal article supplement (PMC2690718)

## SUPPLEMENTAL FIGURES

### **Supplemental Figure 1. Effect of Ca<sup>2+</sup> influx modulators on clastolactacystin $\beta$ -lactone**

**induced neuronal death.** A. Murine neocortical cultures were treated with clastolactacystin- $\beta$ -

lactone (CL, 3  $\mu$ M) for 48 hr. (-) Bay K8644 (BayK, 10  $\mu$ M), kainate (KA, 1  $\mu$ M) or benzamil (BENZ, 10  $\mu$ M) were added to the indicated cultures at the beginning of the treatment period.

Values shown are mean  $\pm$  SEM cell death analyzed by PI fluorescence at the end of the 48 hr treatment period. \* indicates values for BayK and benzamil treated cultures differed significantly

from CL alone ( $P=0.007$  for BayK;  $P=0.019$  for benzamil). The injury reduction in kainate-

treated cultures did not reach significance. B. Similar to A. except that cultures were treated

with 1  $\mu$ M clastolactacystin alone (CL) or with the addition of MK-801 (10  $\mu$ M), D-APV (1 mM)

or MK-801 + kainate (5  $\mu$ M) during the 48 hr treatment with proteasome inhibitor. \* indicates

significant difference from cultures treated with CL alone; # indicates CL+MK+KA condition

differs significantly from CL+MK condition.

### **Supplemental Figure 2. Proteasome inhibition does not alter basal neuronal Ca<sup>2+</sup> efflux.**

Neuronal cultures were loaded with <sup>45</sup>Ca<sup>2+</sup> for 48 hr, then cultures were washed and returned to standard media, either with no additions (Sham) or 1  $\mu$ M or 3  $\mu$ M MG-132. <sup>45</sup>Ca<sup>2+</sup> efflux into the

media was measured at 1 hr intervals. Values shown are mean  $\pm$  SEM % cpm released (cpm in media/cpm in cells at start of efflux period).

### **Supplemental Figure 3. Validation of mag-fura 2 fluorescence as a measure of [Ca<sup>2+</sup>]<sub>ER</sub>.**

A. Murine neocortical cultures were loaded with Mag-fura-2, washed into Ca<sup>2+</sup>-free buffer and then treated with thapsigargin (2.5 μM for 30 min, Thapsigargin) or sham-washed (Sham). Values shown are mean ± SEM 340/380 ratio for at least 40 cells for each condition. \* indicates value in thapsigargin condition differs significantly with that in control condition ( $P < 0.01$ ). B. Similar to A, except cultures were loaded with Mag-fura-2 (black line) or fura-2 (gray line). Images were obtained for 5 min, then digitonin (10 μM) was added and imaging continued for an additional 30-35 min. Values shown are fluorescence intensity (ex360 (isosbestic point)/em510) from a representative tracing for each condition. n= 8 neurons imaged with Mag-fura-2 and 5 for Fura-2.

## Wu et al., Supplemental Figure 1

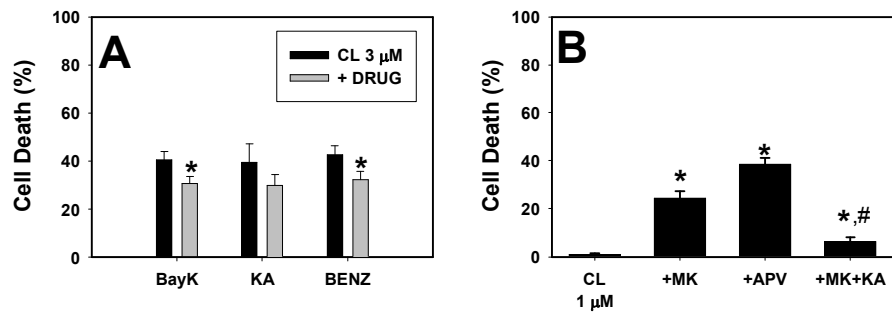

# Wu et al., Supplemental Figure 2

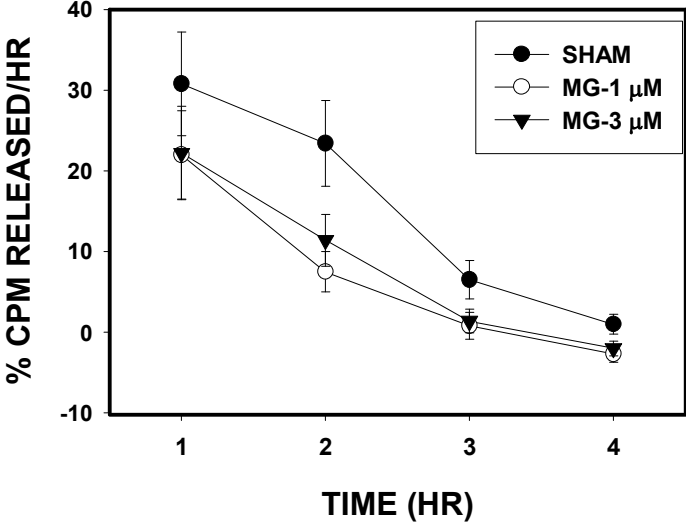

Wu et al., Supplemental Figure 3

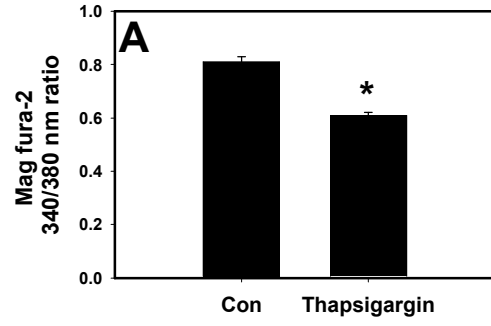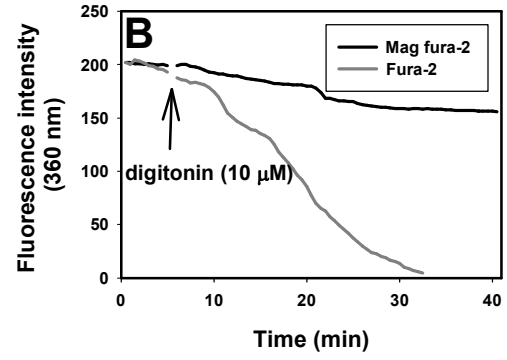

Supplement: NIHMS104824-supplement-01.pdf [file NIHMS104824-supplement-01.pdf]
